# Supplementary material for: Iontronic pressure sensor with high sensitivity over ultra-broad linear range enabled by laser-induced gradient micro-pyramids
Source: PubMed Central journal article supplement (PMC10235028; doi:10.1038/s41467-023-38274-2), 2023-06-01
Supplement: 41467_2023_38274_MOESM3_ESM.pdf [file 41467_2023_38274_MOESM3_ESM.pdf]

## **Description of Additional Supplementary Files**

File Name: Supplementary Movie 1

Description: The mechanical simulation displaying the stress distribution of the different microstructures under pressure loading.

File Name: Supplementary Movie 2

Description: The response time measured by loading a 50g weight.

File Name: Supplementary Movie 3

Description: The response time measured by using a linear actuator.

File Name: Supplementary Movie 4

Description: The experiment to measure the limit of detection.

File Name: Supplementary Movie 5

Description: The experiment to measure the pressure resolution.

File Name: Supplementary Movie 6

Description: Interaction with the robotic hand.
